# Supplementary material
Source: PubMed Central journal article supplement (PMC6483717)
Supplement: jciinsight-4-125754-s105.pdf [file jciinsight-4-125754-s105.pdf]

Fig S1

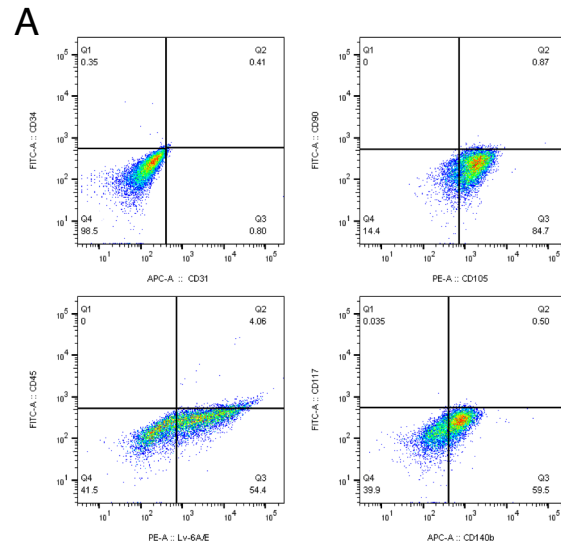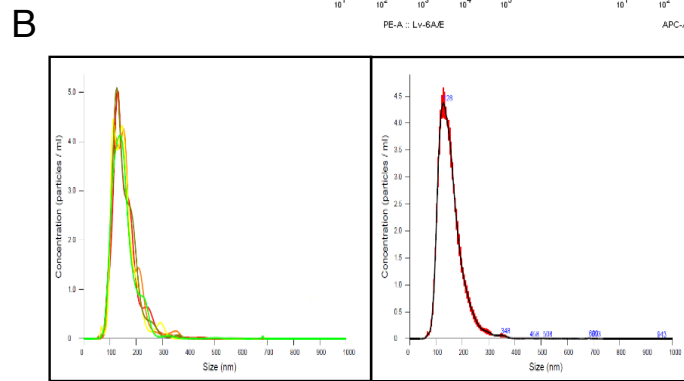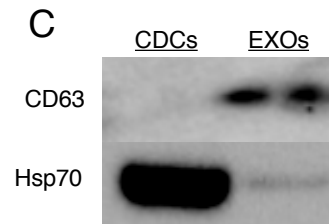

**Figure S1. Characterization of Mouse CDCs and Human EXOs.** (A) Representative flow cytometry dot plot indicating the abundance of selected surface markers. CDCs are negative for hematopoietic surface markers and positive for known CDC surface antigens. (B) Representative histogram from nanoparticle tracking analysis using dynamic light scattering to measure exosome concentration and size. (C) Immunoblot for common exosomal markers from CDCs and their exosomes.

Fig S2

A

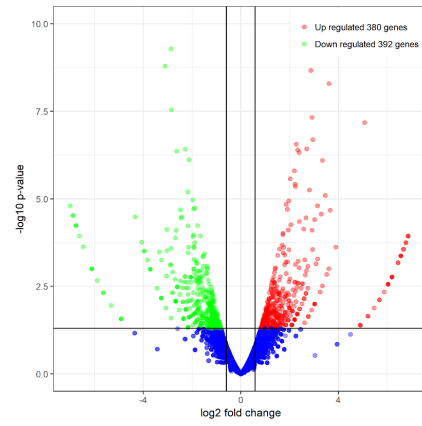

B

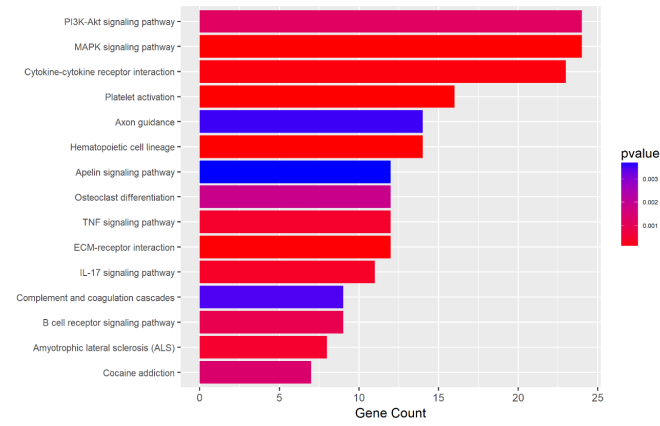

C

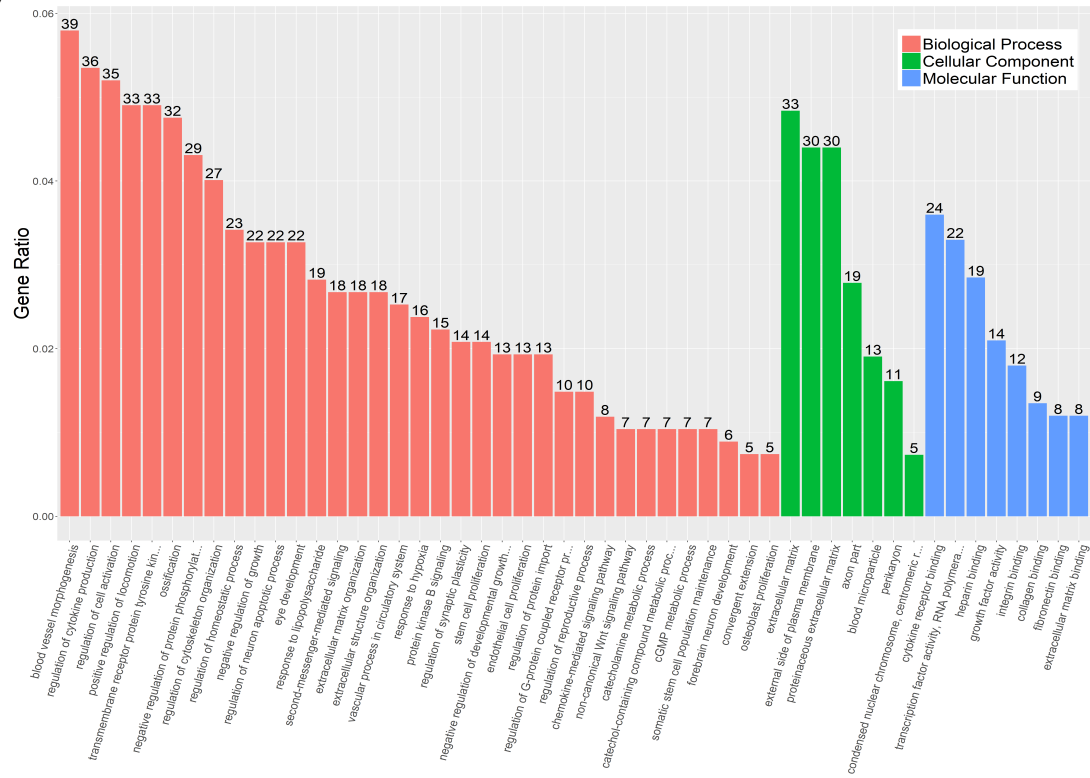

**Figure S2. RNA-Sequencing Analysis of *mdx* Hearts.** (A) Volcano plot depicting differentially expressed genes in vehicle-treated *mdx* hearts relative to wild-type hearts. (B) Kyoto Encyclopedia of Genes and Genomes enrichment analysis of pathways activated in vehicle-treated *mdx* hearts. (C) Gene Ontology enrichment analysis of biological processes, cellular components, and molecular function of CDC-treated *mdx* hearts.

Fig. S3

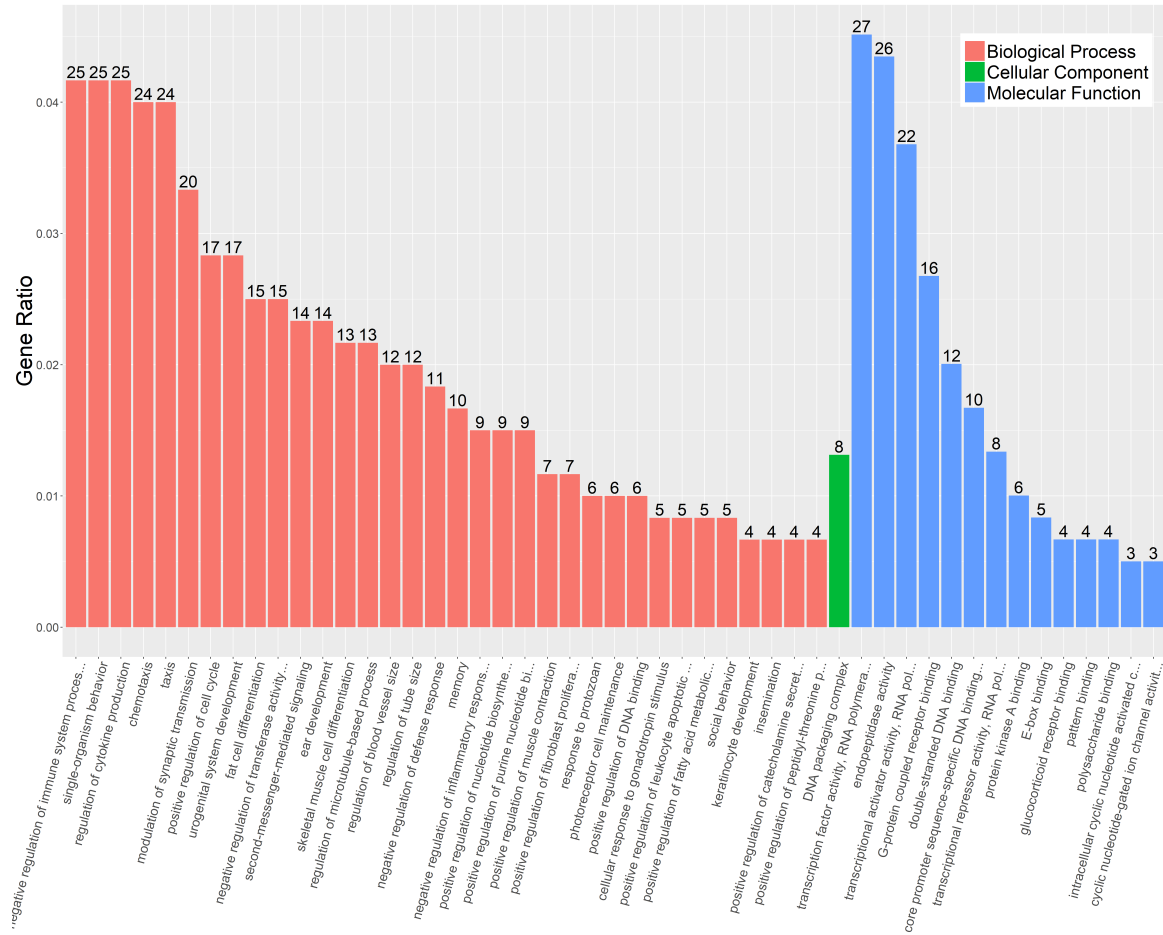

**Figure S3. RNA-Sequencing Analysis of EXO Treated *mdx* Hearts.** Gene Ontology enrichment analysis of biological processes, cellular components, and molecular function of EXO-treated *mdx* hearts.

Fig. S4

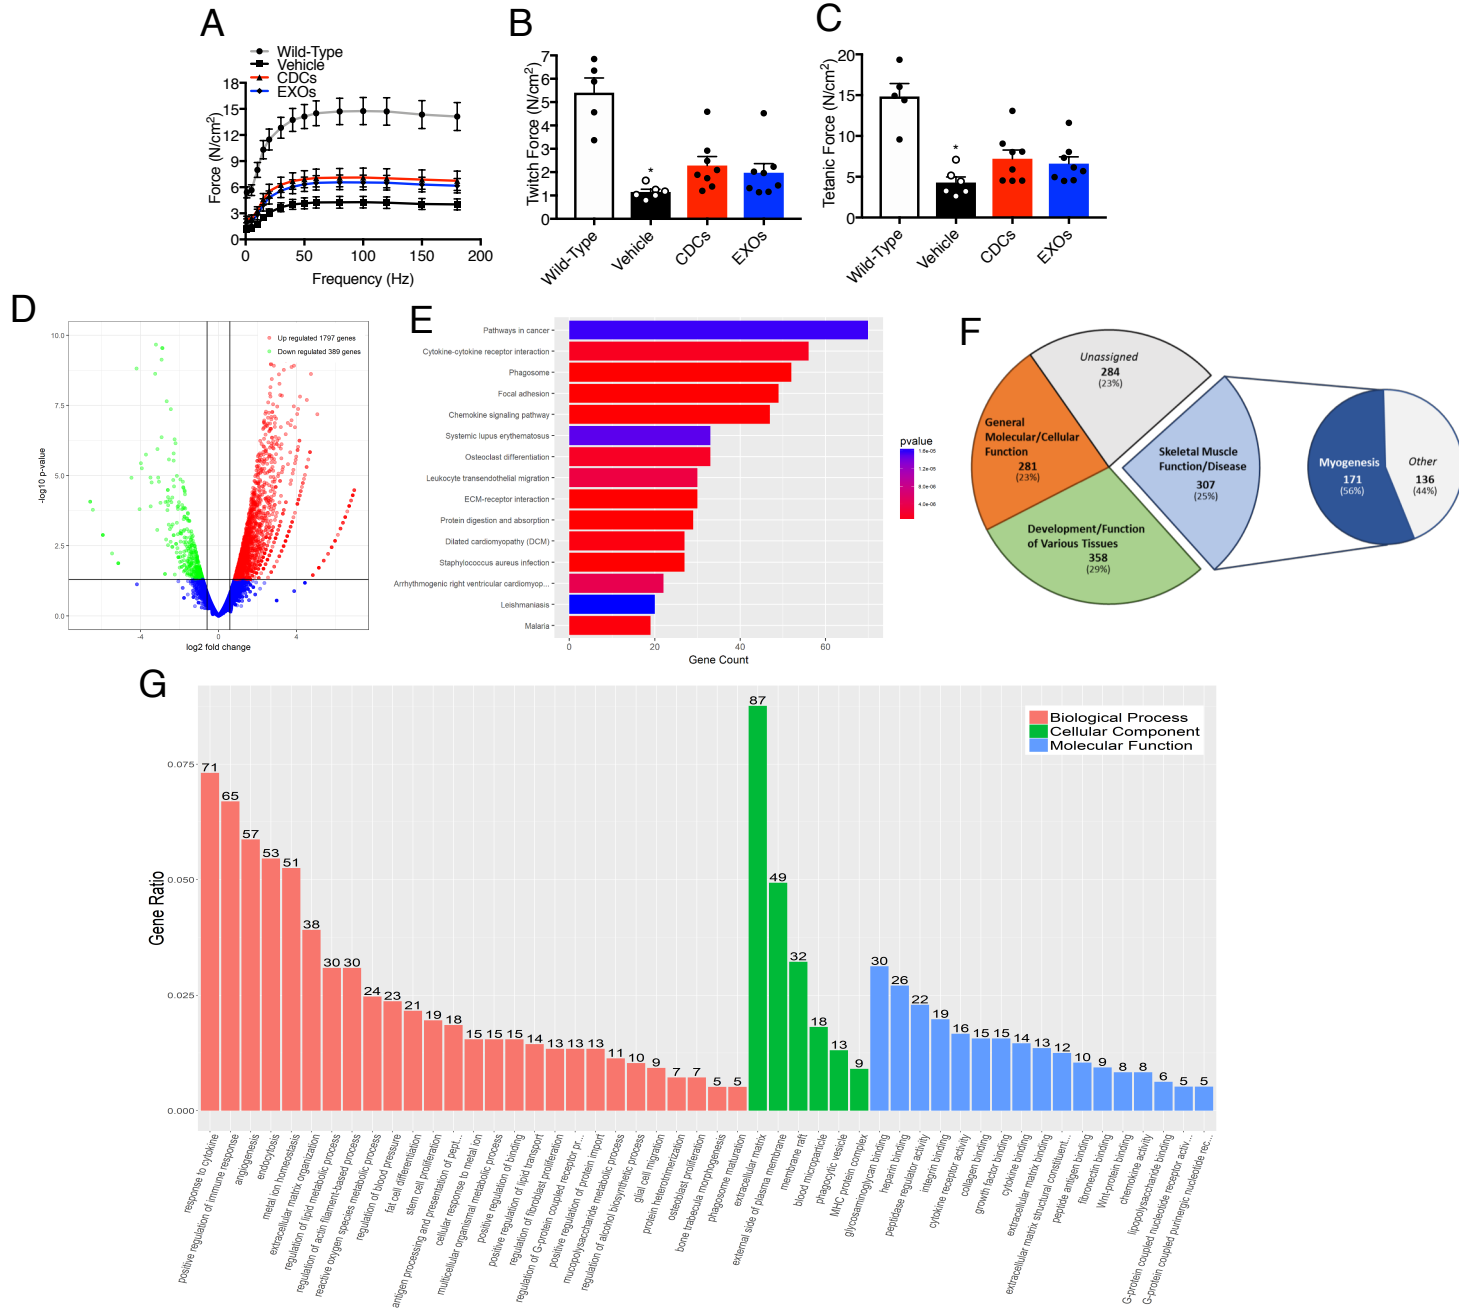

**Figure S4. Biological Effects of CDC or EXO Treatment in *mdx* Mouse Skeletal Muscle.** (A) In vitro force-frequency relationship of wild-type, vehicle, CDC-, and EXO-treated *mdx* diaphragms (n = 5 – 8 per group). CDC treatment shifted the force-frequency curve up and to the left. (B) Twitch and (C) tetanic force derived from A demonstrate CDC and EXO treatment boosts the developed force by *mdx* diaphragms (n = 5 – 8 per group). (D) Colorimetric analysis of protein-carbonyl adducts reveal normalization by CDC treatment in *mdx* solei (n = 7 – 8 per group). (E) Volcano plot depicting differentially expressed genes in vehicle-treated *mdx* solei relative to wild-type solei. (F) Kyoto Encyclopedia of Genes and Genomes enrichment analysis of pathways activated in vehicle-treated *mdx* solei. (G) Custom pathway analysis using IPA assigning genes differentially expressed by CDC treatment in *mdx* solei. (H) Gene Ontology enrichment analysis of biological processes, cellular components, and molecular function of EXO-treated *mdx* solei. Statistical significance was determined by Analysis of Variance (ANOVA) with  $p \leq 0.05$ . When appropriate, a Newman-Keuls correction for multiple comparisons was applied. \*statistically different from baseline, #statistically different from vehicle.



Fig. S5

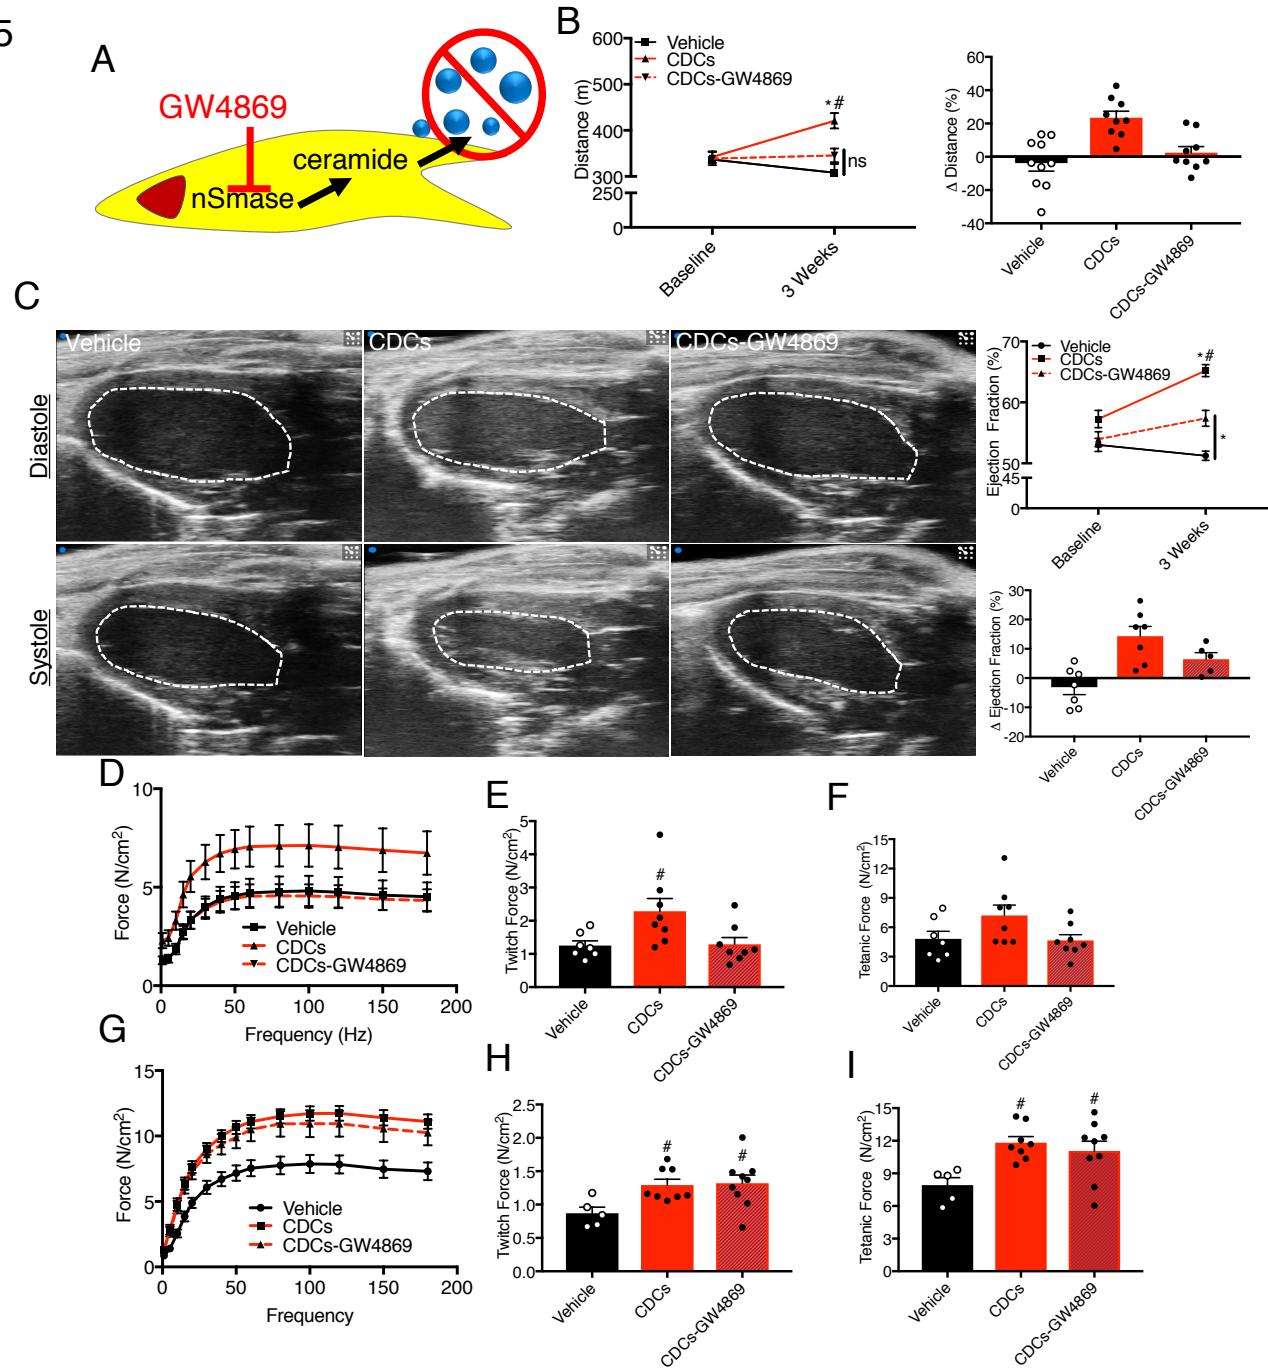

**Figure S5. Inhibition of Exosome Biosynthesis Renders CDCs Ineffective.** (A) Schematic of exosome biosynthesis blockade. (B) Exercise capacity, as determined by a graded exercise test, was not improved in CDC-GW4869 treated *mdx* mice after 3 weeks (n = 8 – 10 per group). (C) Representative echocardiogram tracings. Cardiac function, as measured by transthoracic echocardiography, was modestly increased in CDC-GW4869 treated *mdx* mice after 3 weeks (n = 5 – 8 per group). (D) In vitro force-frequency relationship of wild-type, CDC, and CDC-GW4869 treated *mdx* diaphragms (n = 5 – 8 per group). (E) Twitch and (F) tetanic force derived from D demonstrate that GW4869 blocks the functional improvements of CDCs in the *mdx* mouse diaphragm. (G) *In vitro* force-frequency relationship of wild-type, CDC, and CDC-GW4869 treated *mdx* solei (n = 5 – 9 per group). (H) Twitch and (I) tetanic force derived from G demonstrate that GW4869 does not block the functional improvements of CDCs in the *mdx* mouse soleus. Bar graphs depict mean  $\pm$  SEM. Statistical significance was determined by an analysis of variance (ANOVA) with  $p \leq 0.05$ . When appropriate, a Newman-Keuls correction for multiple comparisons was applied. \*statistically different from baseline, #statistically different from vehicle. The vehicle control and CDC-treated data are shared from figures in the main text and supplement, but experiments were conducted contemporaneously. Comparisons were made between three groups.

Fig. S6

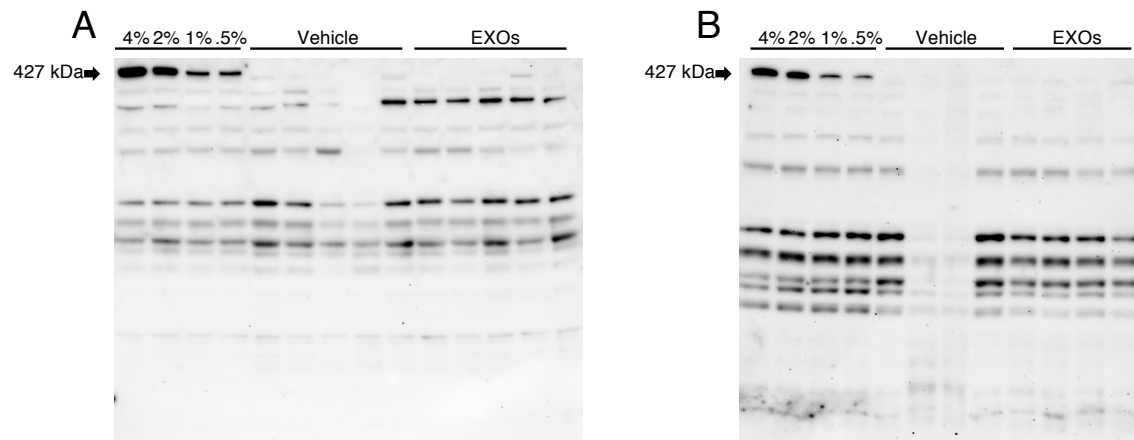

**Figure S6. Dystrophin expression in EXO-treated *mdx* skeletal muscle.** Immunoblot of the full-length dystrophin protein in the *mdx* soleus (**A**) and diaphragm (**B**). 4 – 0.5% represents a titration of wild-type dystrophin levels for each muscle.
